# Supplementary material for: Occupational Noise-Induced Hearing Loss among Migrant Workers in Kuwait
Source: MDPI journal article supplement (doi:10.3390/ijerph18105295), 2021-05-16
Supplement: s1 [file s1]

**Table S1.** Baseline characteristics of industrial workers according to noise exposure.

| Demographic characteristics | N    | All        |        | Not Exposed to noise |        | Exposed to noise |        |
|-----------------------------|------|------------|--------|----------------------|--------|------------------|--------|
|                             |      | (n = 3474) |        | (n = 2262)           |        | (n =1212)        |        |
|                             |      | n          | (%)    | n                    | (%)    | n                | (%)    |
| <b>All</b>                  | 3474 | 3474       | (100)  | 2262                 | (65.1) | 1212             | (34.9) |
| <b>Age (years)</b>          | 3474 |            |        |                      |        |                  |        |
| 21–30                       |      | 712        | (20.5) | 534                  | (75)   | 178              | (25)   |
| 31–40                       |      | 1268       | (36.5) | 819                  | (64.6) | 449              | (35.4) |
| 41–50                       |      | 921        | (26.5) | 564                  | (61.2) | 357              | (38.8) |
| 51–60                       |      | 517        | (14.9) | 307                  | (59.4) | 210              | (40.6) |
| ≥61                         |      | 56         | (1.60) | 38                   | (67.9) | 18               | (32.1) |
| <b>Gender</b>               | 3474 |            |        |                      |        |                  |        |
| Male                        |      | 3434       | (98.8) | 2230                 | (64.9) | 1204             | (35.1) |
| Female                      |      | 40         | (1.2)  | 32                   | (80)   | 8                | (20)   |
| <b>Nationality</b>          | 3474 |            |        |                      |        |                  |        |
| Indian                      |      | 1974       | (56.8) | 1249                 | (63.3) | 725              | (36.7) |
| Egyptian                    |      | 483        | (13.9) | 346                  | (71.6) | 137              | (28.4) |
| Bangladeshi                 |      | 271        | (7.8)  | 181                  | (66.8) | 90               | (33.2) |
| Filipino                    |      | 181        | (5.2)  | 93                   | (51.4) | 88               | (48.6) |
| Pakistani                   |      | 141        | (4.1)  | 86                   | (61)   | 55               | (39)   |
| Kuwaiti                     |      | 70         | (2.0)  | 55                   | (78.6) | 15               | (21.4) |
| Others                      |      | 354        | (10.2) | 252                  | (71.2) | 102              | (28.8) |
| <b>Experience (years)</b>   | 3441 |            |        |                      |        |                  |        |
| ≤15                         |      | 2974       | (85.4) | 1947                 | (65.5) | 1027             | (34.5) |
| 16–30                       |      | 418        | (12.1) | 262                  | (62.7) | 156              | (37.3) |
| ≥30                         |      | 49         | (1.40) | 27                   | (55.1) | 22               | (44.9) |

**Table S2.** Baseline job and industry type of industrial workers according to noise exposure status.

| Job and industry type                                                | N    | All        |        | Not Exposed to noise |        | Exposed to noise |        |
|----------------------------------------------------------------------|------|------------|--------|----------------------|--------|------------------|--------|
|                                                                      |      | (n = 3474) |        | (n = 2262)           |        | (n = 1212)       |        |
|                                                                      |      | n          | (%)    | n                    | (%)    | n                | (%)    |
| All                                                                  | 3474 | 3474       | (100)  | 2262                 | (79.6) | 1212             | (20.4) |
| Job Type                                                             | 3474 |            |        |                      |        |                  |        |
| Managers                                                             |      | 38         | (1.1)  | 30                   | (78.9) | 8                | (21.1) |
| Professionals                                                        |      | 204        | (5.9)  | 155                  | (76)   | 49               | (24)   |
| Technicians and associate professionals                              |      | 886        | (25.5) | 645                  | (72.8) | 241              | (27.2) |
| Clerical support                                                     |      | 110        | (3.2)  | 101                  | (91.8) | 9                | (8.2)  |
| Services and sales                                                   |      | 22         | (0.6)  | 20                   | (90.9) | 2                | (9.1)  |
| Elementary occupations                                               |      | 735        | (21.2) | 444                  | (60.5) | 291              | (39.5) |
| Crafts and related trade works                                       |      | 669        | (19.3) | 410                  | (61.3) | 259              | (38.7) |
| Plant and machine operators and assemblers                           |      | 810        | (23.3) | 457                  | (56.4) | 353              | (43.6) |
| Industry type                                                        | 3474 |            |        |                      |        |                  |        |
| Mining and quarrying                                                 |      | 786        | (22.6) | 484                  | (61.6) | 302              | (38.4) |
| Manufacturing                                                        |      | 1858       | (53.5) | 1118                 | (60.2) | 740              | (39.8) |
| Water supply, sewerage, waste management, and remediation activities |      | 89         | (2.6)  | 89                   | (100)  | 0                | (0)    |
| Construction                                                         |      | 190        | (5.5)  | 182                  | (95.8) | 8                | (4.2)  |
| Wholesale and retail trade and repair of vehicles and motorcycles    |      | 9          | (0.3)  | 4                    | (44.4) | 5                | (55.6) |
| Transportation and storage                                           |      | 42         | (1.2)  | 27                   | (64.3) | 15               | (35.7) |
| Professional, scientific, and technical activities                   |      | 84         | (2.4)  | 84                   | (100)  | 0                | (0)    |
| Administrative and supportive service activities                     |      | 416        | (12)   | 274                  | (65.9) | 142              | (34.1) |
